# Supplementary material for: Synthesis of a Pyrrolo[1,2-a]quinazoline-1,5-dione Derivative by Mechanochemical Double Cyclocondensation Cascade
Source: MDPI journal article supplement (doi:10.3390/molecules27175671), 2022-09-02

# Supplementary Material

## Synthesis of a Pyrrolo[1,2-*a*]quinazoline-1,5-dione Derivative by Mechanochemical Double Cyclocondensation Cascade

Vanessza Judit Kolcsár <sup>1</sup> and György Szöllősi <sup>2,\*</sup>

<sup>1</sup> Department of Organic Chemistry, Institute of Chemistry, Faculty of Science and Informatics,  
University of Szeged, Dóm tér 8, 6720, Szeged, Hungary

<sup>2</sup> ELKH-SZTE, Stereochemistry Research Group, University of Szeged, Eötvös utca 6, 6720,  
Szeged, Hungary

\* Corresponding author

### Content

|                                                                                                                                                | page |
|------------------------------------------------------------------------------------------------------------------------------------------------|------|
| General formulae                                                                                                                               | 2    |
| Figure S1. Effect of temperature on the reaction of anthranilamide ( <b>1</b> ) with ethyl levulinate ( <b>2</b> ) in the batch system         | 3    |
| Figure S2. Effect of the catalyst amount on the reaction of anthranilamide ( <b>1</b> ) with ethyl levulinate ( <b>2</b> ) in the batch system | 3    |
| <sup>1</sup> H and <sup>13</sup> C NMR spectra of the isolated products                                                                        | 4    |
| Chromatograms and mass spectra of the products (GC-FID and GC-MSD)                                                                             | 6    |

## General formulae

Reaction of anthranilamide (**1**) and ethyl levulinate (**2**):

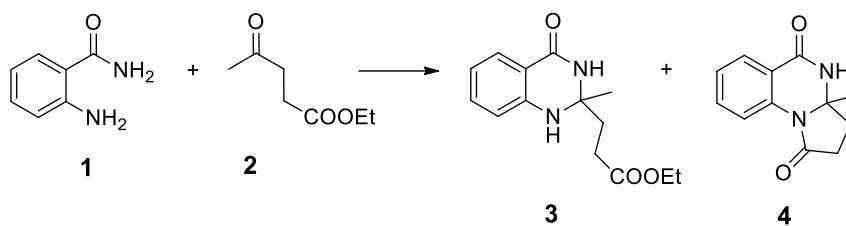

The conversions and the selectivities were calculated with the formulas given below using the relative concentrations determined by gas chromatography.

$$\text{Conv} = \frac{c_{0,1} - c_1}{c_{0,1}} \times 100 (\%)$$

$$\text{S3} = \frac{c_3}{c_{0,1} - c_1} \times 100 (\%)$$

$$\text{S4} = \frac{c_4}{c_{0,1} - c_1} \times 100 (\%)$$

where:

**Conv**: conversion, **S3**: selectivity of product **3**, **S4**: selectivity of product **4**;

$c_{0,1}$ : initial concentration of **1**;  $c_1$ : concentration of the unreacted **1**;

$c_3$ : concentration of the resulted **3**;  $c_4$ : concentration of the resulted **4**.

### Effect of temperature on the reaction of anthranilamide (1) with ethyl levulinate (2) in the batch system

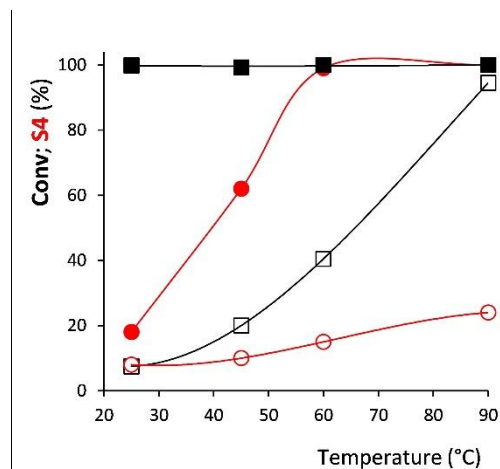

**Figure S1.** Effect of the reaction temperature with (■, ●) and without (□, ○) catalyst. Reaction conditions: 100 mg as received Amberlyst® 15, 1 mmol anthranilamide (1), 1.5 mmol ethyl levulinate (2), 24 h, magnetic stirring 600 rpm; conversion: ■, □; selectivity of 4 (S4): ●, ○.

### Effect of the catalyst amount on the reaction of anthranilamide (1) with ethyl levulinate (2) in the batch system

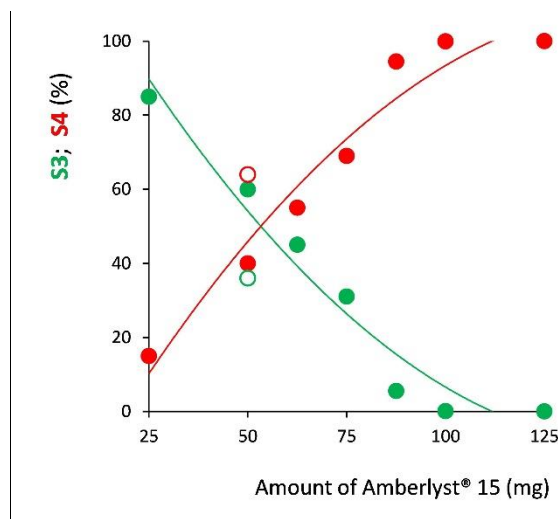

**Figure S2.** Effect of the catalyst amount on the selectivity of 3 (S3: ●) and selectivity of 4 (S4: ●) using as received Amberlyst® 15, and on the selectivity of 3 (S3: ○) and the selectivity of 4 (S4: ○) using pre-milled Amberlyst® 15; Reaction conditions: 1 mmol 1, 1.5 mmol 2, 60°C, 24 h, magnetic stirring 600 rpm, the conversion of 1 was >99% in all these reactions.

## $^1\text{H}$ and $^{13}\text{C}$ NMR spectra of the isolated products

Ethyl 3-(2-methyl-4-oxo-1,2,3,4-tetrahydroquinazolin-2-yl)propanoate (**3**)

$^1\text{H}$  NMR (500 MHz,  $\text{CDCl}_3$ )

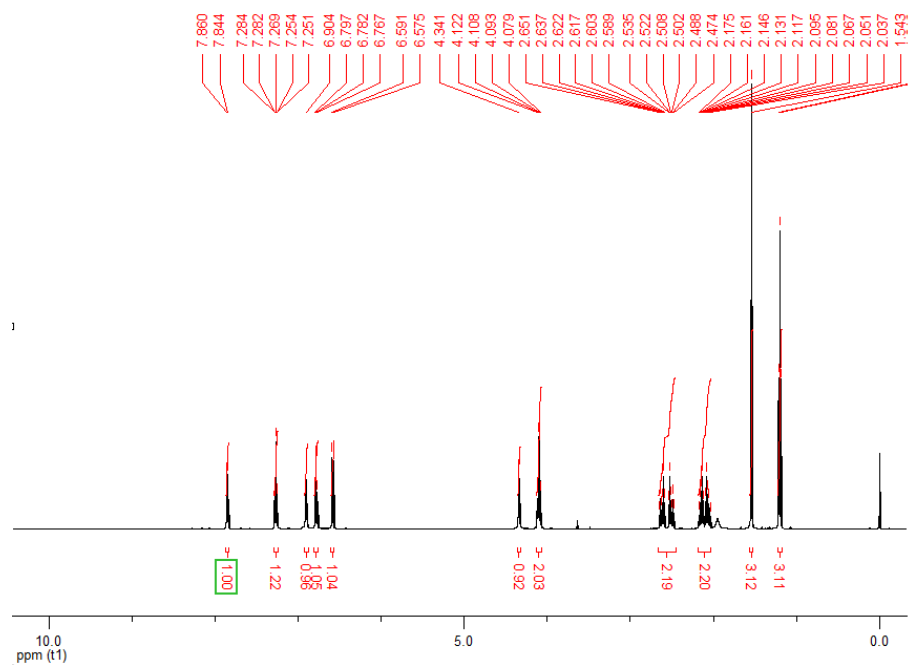

$^{13}\text{C}$  NMR (500 MHz,  $\text{CDCl}_3$ )

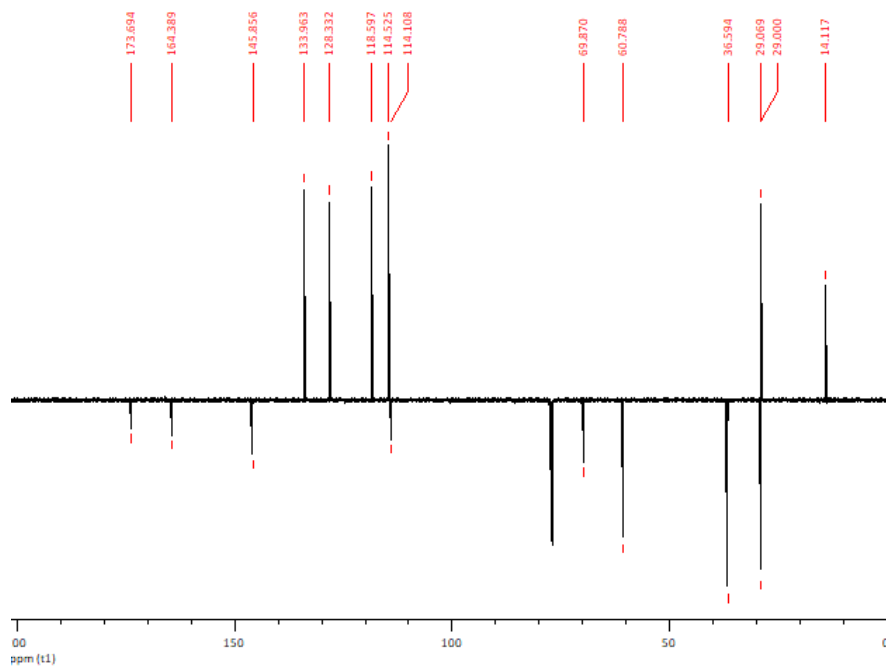

3a-Methyl-2,3,3a,4-tetrahydropyrrolo[1,2-*a*]quinazoline-1,5-dione (**4**)

$^1\text{H}$  NMR (500 MHz,  $\text{CDCl}_3$ )

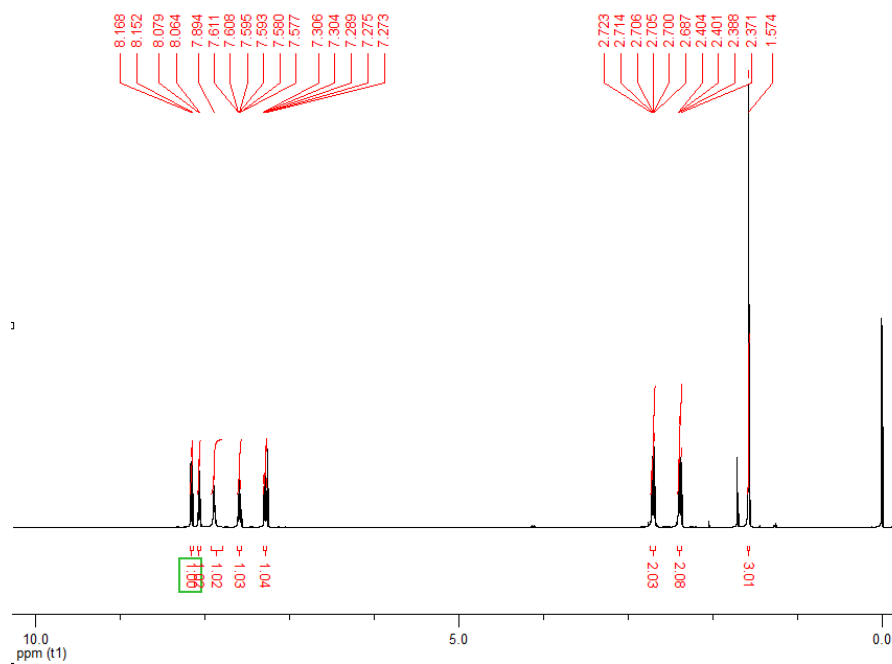

$^{13}\text{C}$  NMR (500 MHz,  $\text{CDCl}_3$ )

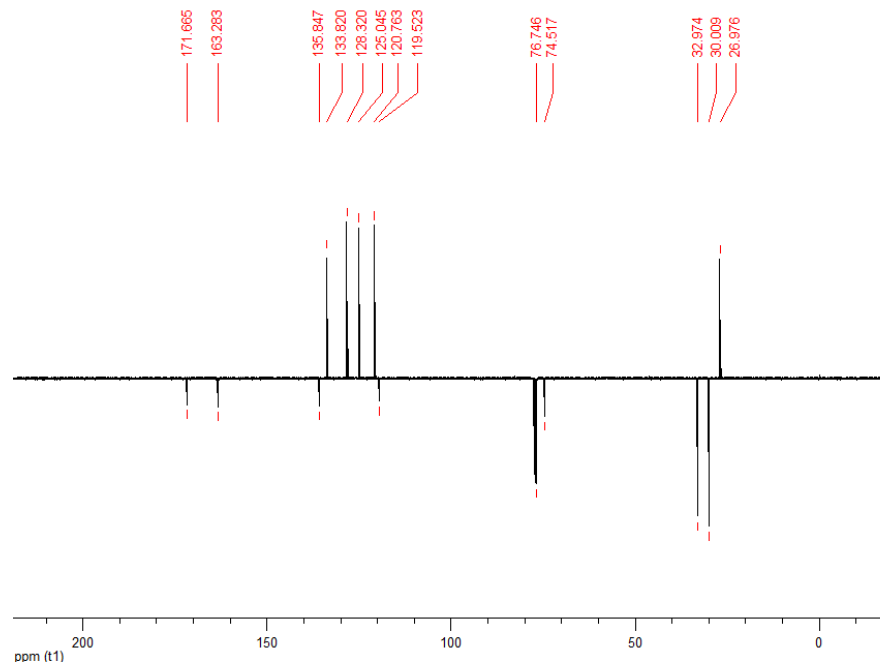

## Chromatograms and mass spectra of the products (GC-FID and GC-MSD)

Separation of the products using GC-FID, chromatograms of raw products

Table 5, entry 4

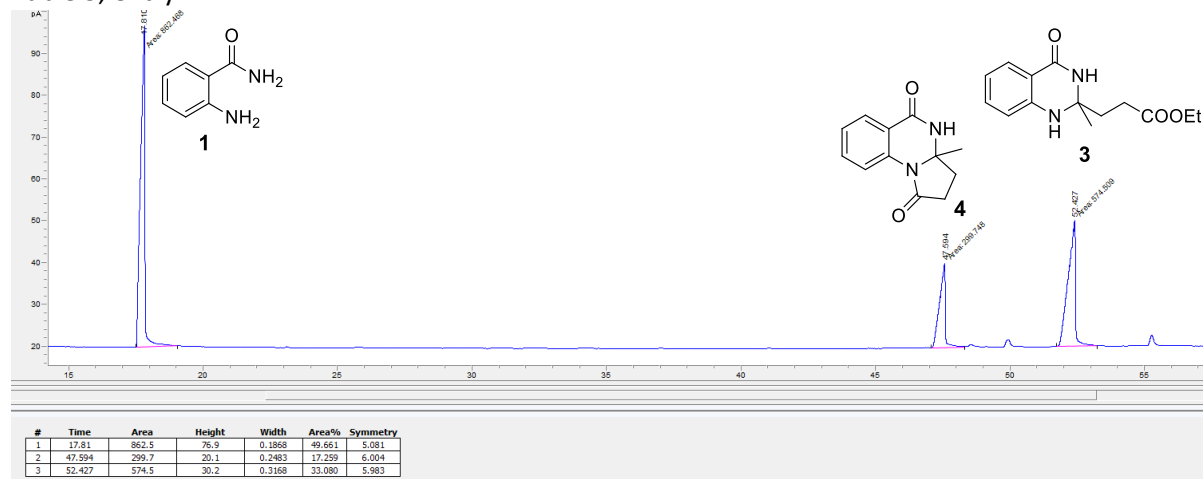

Table 2, entry 4

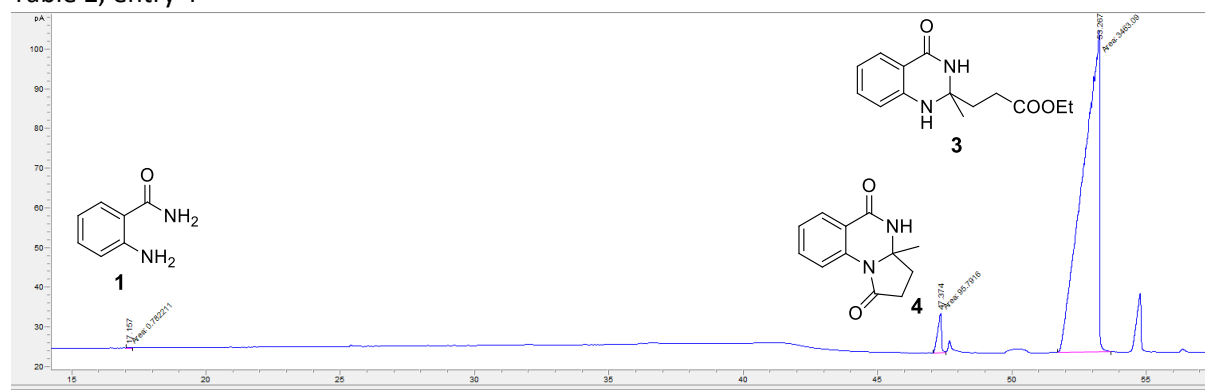

Table 2, entry 5

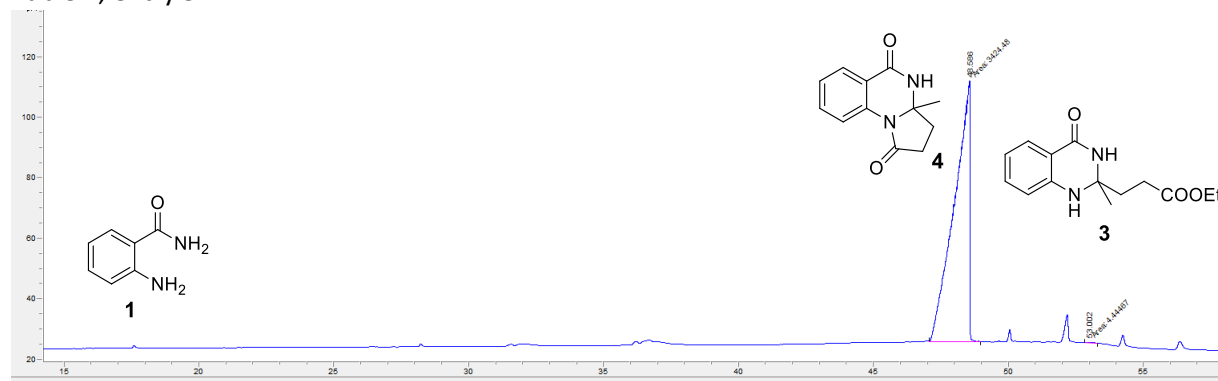

Retention times:  $R_t(1) = 17.8$  min,  $R_t(3) = 47.6$  min,  $R_t(4) = 52.4$  min

Identification of the products by GC-MSD, EI-MS mass spectra of the purified products

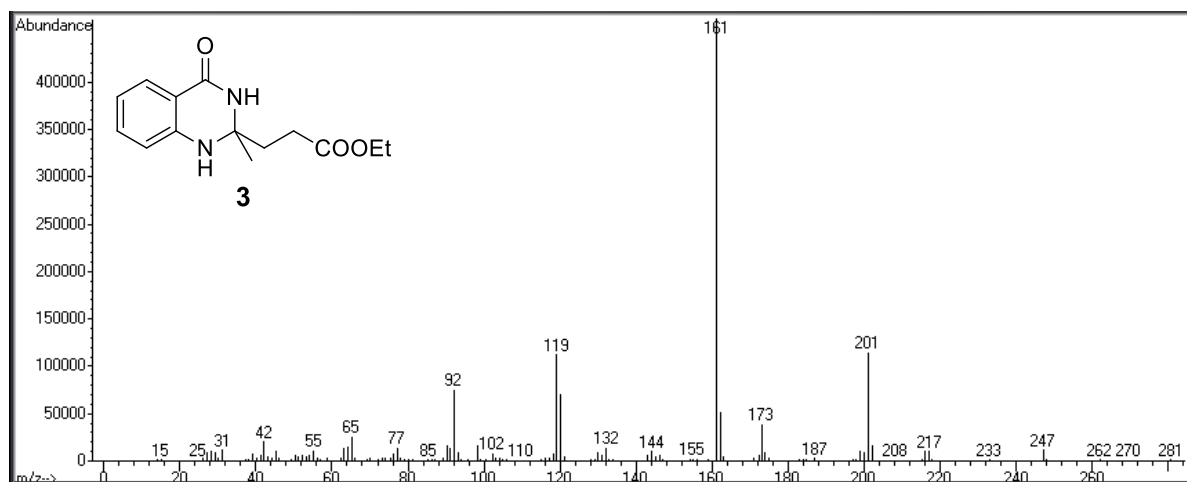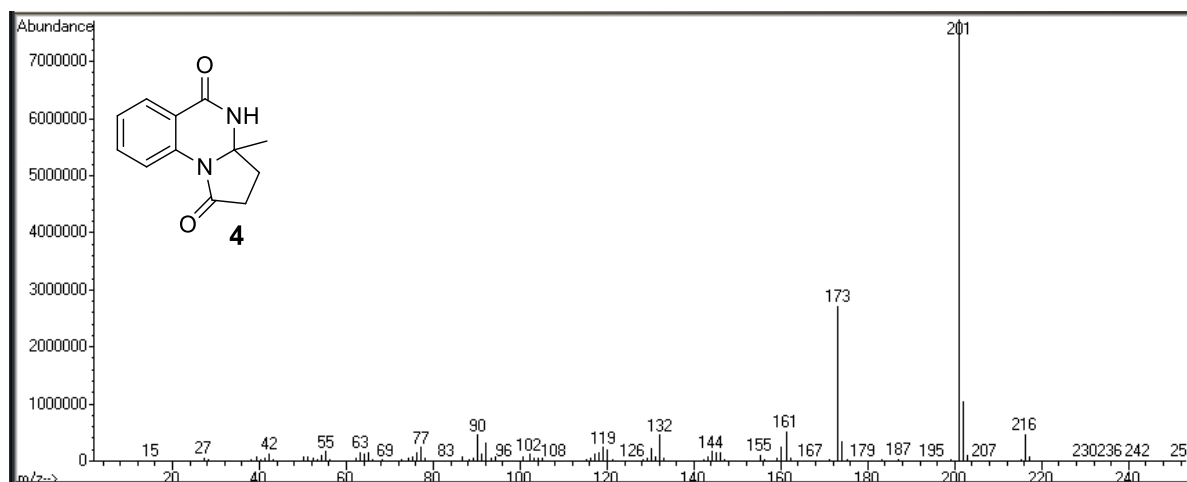

Supplement: s1 [file s1]
